# Supplementary material
Source: PubMed Central journal article supplement (PMC6415749)
Supplement: NIHMS1016176-supplement-Supplemental_figures.pdf [file NIHMS1016176-supplement-Supplemental_figures.pdf]

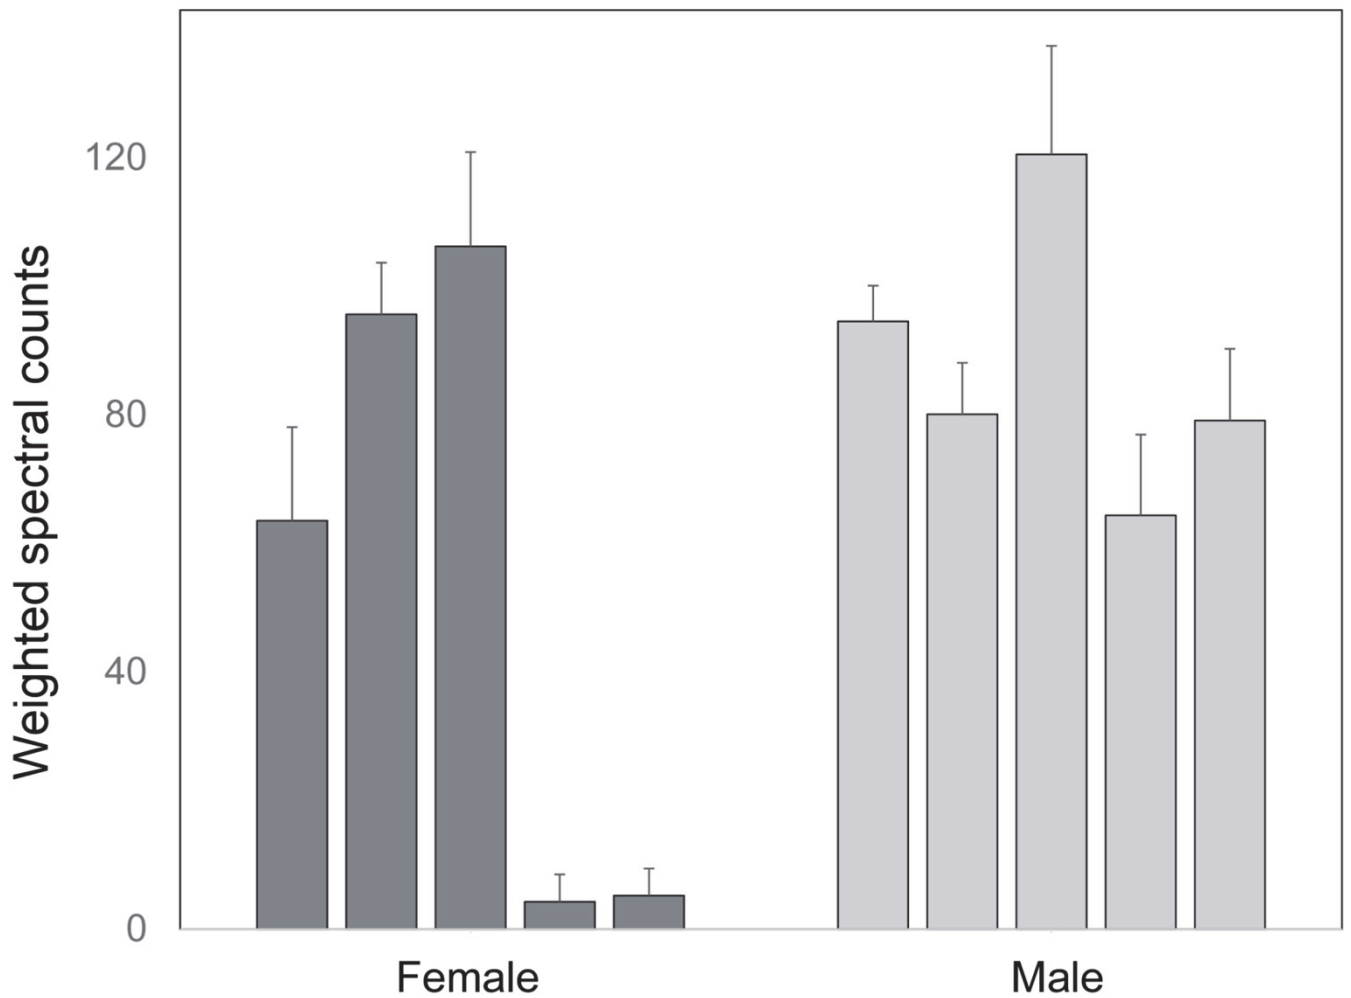

**Figure S1. Variation in VSIG8 protein level in hair samples from monozygotic twin pairs.**

Illustrated are the averages and standard deviations of each twin pair (pooled for the two individuals, each sampled in quadruplicate) for 5 female and 5 male pairs. Spectral counts were not significantly different within twin pairs. The average VSIG8 level from the 5 male pairs was the same as from the highest three female pairs ( $88 \pm 22$ ), but the level in two female pairs was significantly lower ( $5 \pm 4$ ).

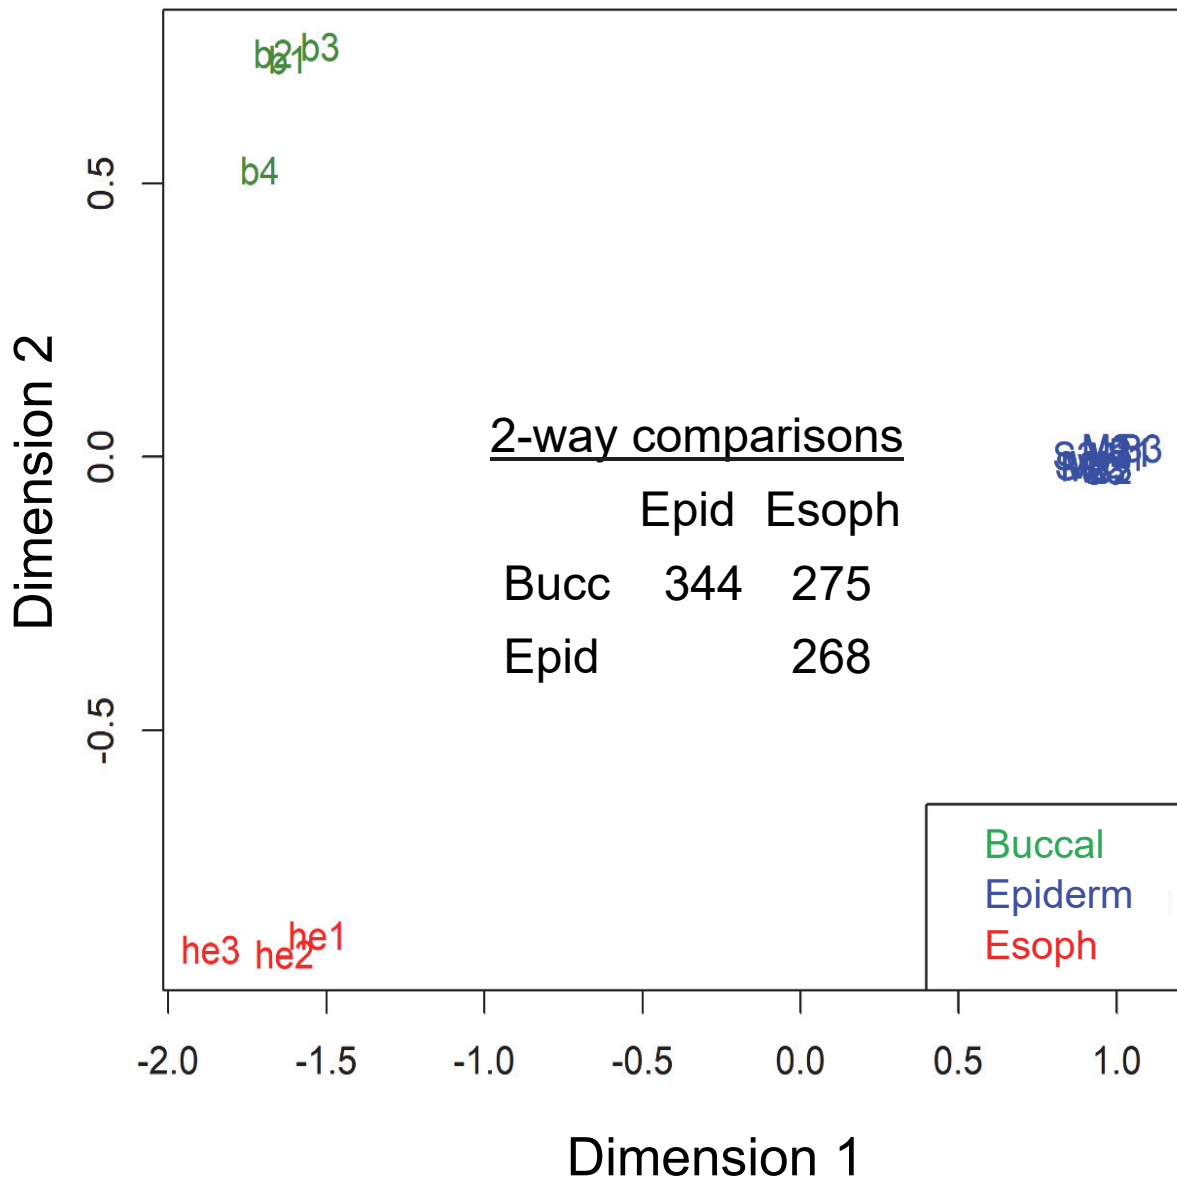

**Figure S2. Comparison of buccal, epidermal and esophageal protein profiles.** The multidimensional scaling plot of all the samples shows log fold change distances between samples. Prior to analysis, proteins averaging less than 1 weighted spectral count were filtered. Analyses were conducted using the limma-voom Bioconductor pipeline<sup>[58]</sup> with limma version 3.32.10, edgeR version 3.18.1, and R version 3.4.4, originally developed for RNA sequencing data. Protein expression was compared between sample types using a one-way ANOVA model in limma, with standard errors of log fold changes adjusted to account for within-subject correlations. Illustrated is a compilation of buccal (4 subjects, b1-b4)), epidermal (4 subjects in triplicate, B1-B3, M1-M3, S1-S3, W1-W3) and esophageal samples (3 subjects, he1-he3).
